# Supplementary material for: Grape Cultivar Features Differentiate the Grape Rhizosphere Microbiota
Source: MDPI journal article supplement (doi:10.3390/plants11091111), 2022-04-20
Supplement: s1 [file s1]

**Table S1.** Number of sequences, total OTUs in bacteria and fungi

|                 |                 | Lon (10 <sup>3</sup> ) | Zin (10 <sup>3</sup> ) | Cab (10 <sup>3</sup> ) | Cha (10 <sup>3</sup> ) | Syr (10 <sup>3</sup> ) | Mer (10 <sup>3</sup> ) | Gem (10 <sup>3</sup> ) | Rie (10 <sup>3</sup> ) | Pin (10 <sup>3</sup> ) |
|-----------------|-----------------|------------------------|------------------------|------------------------|------------------------|------------------------|------------------------|------------------------|------------------------|------------------------|
| <b>Bacteria</b> | <b>Sequence</b> | --                     | 52.27±20.87            | 52.98±20.45            | 59.34±15.85            | 77.50±38.31            | 47.19±9.34             | 44.10±21.70            | 47.50±8.75             | 64.99±11.06            |
|                 | <b>OTUs</b>     | --                     | 3.89±0.95              | 3.97±0.74              | 4.19±0.59              | 4.45±0.71              | 3.72±0.36              | 3.48±0.82              | 3.84±0.39              | 4.49±0.43              |
| <b>Fungi</b>    | <b>Sequence</b> | 75.62±27.91            | 97.78±118.78           | 53.56±26.06            | 96.38±25.58            | 100.07±25.74           | 71.88±27.44            | 77.82±31.79            | 68.73±48.55            | 79.70±24.48            |
|                 | <b>OTUs</b>     | 0.89±0.22              | 1.09±0.20              | 1.00±0.26              | 1.31±0.13              | 1.29±0.12              | 1.08±0.27              | 1.24±0.25              | 1.07±0.37              | 1.17±0.18              |

**Table S2.** Indices of co-networks

|                 | Nodes | Edges | Disgree distribution | Betweenness Centrality Distribution | Density | Modularity |
|-----------------|-------|-------|----------------------|-------------------------------------|---------|------------|
| <b>Bacteria</b> | 1384  | 6973  | 10.077               | 4                                   | 0.007   | 0.073      |
| <b>Fungi</b>    | 1020  | 4038  | 7.918                | 4                                   | 0.008   | 0.151      |

**Table S3.** Bacterial sequences aligned using BLAST from the NCBI nucleotide database.

| OTU No. | References species        | Accession.No | Similarity |
|---------|---------------------------|--------------|------------|
| OTU130  | <i>Arthrobacter</i> sp.   | MG860374.1   | 100        |
| OTU375  | Uncultured bacterium      | MF113989.1   | 100        |
| OTU646  | <i>Bacillus</i> sp.       | MK414968.1   | 100        |
| OTU795  | <i>Steroidobacter</i> sp. | JF515710.1   | 100        |
| OTU1182 | Uncultured bacterium      | LC026882.1   | 100        |
| OTU1203 | <i>Kocuria</i>            | MK696247.1   | 100        |
| OTU1226 | <i>Bradyrhizobium</i> sp. | FJ380996.1   | 100        |
| OTU1496 | <i>Romboutsia</i> sp.     | LT996174.1   | 100        |
| OTU2150 | Uncultured bacterium      | KM328768.1   | 100        |
| OTU2257 | <i>Blastococcus</i> sp.   | MK696404.1   | 100        |
| OTU2425 | <i>Arthrobacter</i> sp.   | MG860431.1   | 100        |
| OTU2536 | <i>Arthrobacter</i> sp.   | MK696393.1   | 100        |
| OTU3419 | <i>Arthrobacter</i> sp.   | KX171688.1   | 100        |
| OTU3429 | Uncultured bacterium      | MH445072.1   | 100        |
| OTU3574 | <i>Arthrobacter</i> sp.   | MK053924.1   | 100        |

---

|                |                            |            |     |
|----------------|----------------------------|------------|-----|
| <b>OTU3775</b> | Uncultured Actinobacterium | KJ081636.1 | 100 |
| <b>OTU3794</b> | Nocardioides (family)      | MK138625.1 | 100 |
| <b>OTU3854</b> | Planomicrobium             | MH550146.1 | 100 |

---

**Table S4.** Fungal sequences aligned using BLAST from the NCBI nucleotide database.

| OTU No. | References species      | Accession. No | Similarity(%) |
|---------|-------------------------|---------------|---------------|
| OTU104  | <i>Cladosporium</i> sp. | MG569541.1    | 100           |
| OTU232  | Nectriaceae             | HG936943.1    | 100           |
| OTU252  | Uncultured fungi        | KU931455.1    | 100           |
| OTU445  | Tremellomycetes         | HG935384.1    | 100           |
| OTU765  | <i>Alternaria</i> sp.   | MK461092.1    | 100           |
| OTU858  | Solicoccozyma           | KY105435.1    | 100           |
| OTU891  | Uncultured fungi        | MF148734.1    | 100           |
| OTU896  | <i>Alternaria</i> sp.   | MK461092.1    | 100           |
| OTU1019 | <i>Alternaria</i> sp.   | MK461092.1    | 100           |
| OTU1146 | Phoma                   | KT150684.1    | 99.61         |
| OTU1289 | Ascochyta               | KF293988.1    | 100           |
| OTU1514 | Thyrostroma sp          | MG020338.1    | 95.31         |
| OTU1601 | Uncultured fungi        | JX390488.1    | 100           |
| OTU1683 | <i>Alternaria</i> sp.   | MK461092.1    | 100           |
| OTU1730 | <i>Fusarium</i> sp.     | MF509747.1    | 100           |

---

|         |                        |            |       |
|---------|------------------------|------------|-------|
| OTU1732 | Tremellomycetes        | HG935384.1 | 100   |
| OTU1736 | <i>Mortierella</i> sp. | MK281958.1 | 98.38 |
| OTU1737 | <i>Chaetomium</i> sp.  | KY132110.1 | 100   |
| OTU1740 | Uncultured fungi       | KU931358.1 | 100   |
| OTU1781 | Uncultured fungi       | KU931455.1 | 100   |
| OTU1795 | Uncultured fungi       | JX333053.1 | 100   |
| OTU1800 | Uncultured fungi       | JX359333.1 | 100   |
| OTU1819 | <i>Fusarium</i> sp.    | KJ690090.1 | 100   |
| OTU1859 | <i>Alternaria</i> sp.  | MK461092.1 | 100   |
| OTU1941 | <i>Alternaria</i> sp.  | MK461092.1 | 100   |
| OTU1975 | Uncultured fungi       | KU534664.1 | 100   |
| OTU1999 | Uncultured fungi       | GQ225148.1 | 100   |
| OTU2024 | Uncultured fungi       | JX984789.1 | 98    |
| OTU2025 | Chaetomium             | KY132110.1 | 100   |
| OTU2094 | Neonectria             | MF782762.1 | 100   |
| OTU2104 | Uncultured fungi       | JX333053.1 | 100   |
| OTU2180 | Tremellomycetes        | HG935384.1 | 100   |

---

|                |                  |            |     |
|----------------|------------------|------------|-----|
| <b>OTU2249</b> | Tremellomycetes  | HG935384.1 | 100 |
| <b>OTU2346</b> | Uncultured fungi | JX352646.1 | 100 |
| <b>OTU2352</b> | Uncultured fungi | GQ225160.1 | 100 |
| <b>OTU2365</b> | Acremonium       | KM816680.1 | 100 |

**Table S5.** Analysis of soil physical and chemical indexes of the rhizosphere soils

| Name       | pH   | Salty | conductivity ( $\mu\text{m}^{-1}\text{cm}$ ) |
|------------|------|-------|----------------------------------------------|
| <b>Cab</b> | 7.58 | 70.97 | 400.0                                        |
| <b>Mer</b> | 7.38 | 92.71 | 566.0                                        |
| <b>Pin</b> | 7.78 | 90.71 | 285.0                                        |
| <b>Gem</b> | 7.64 | 47.81 | 287.0                                        |
| <b>Zin</b> | 7.78 | 47.96 | 398.0                                        |
| <b>Syr</b> | 7.70 | 47.18 | 210.0                                        |
| <b>Lon</b> | 8.37 | 48.34 | 131.8                                        |
| <b>Rie</b> | 8.20 | 47.26 | 135.9                                        |
| <b>Cha</b> | 7.78 | 71.48 | 220.0                                        |

**Table S6.** Physico-chemical characteristics of the soil samples.

| Item                 | Content (%) | Detection method |
|----------------------|-------------|------------------|
| Organic matter       | 67.6        | NY/T 1121.6-2006 |
| Total nitrogen       | 2.35        | NY/T 53-1987     |
| Available phosphorus | 1.26        | GB/T 17141-1997  |
| Available potassium  | 1.40        | NY/T 889-2004    |

**Table S7.** Air condition in the sampling site

| Tem (°C) | AQI | PM <sub>2.5</sub> (μg. m <sup>-3</sup> ) | PM <sub>10</sub> (μg. m <sup>-3</sup> ) | SO <sub>2</sub> (μg. m <sup>-3</sup> ) | CO (mg. m <sup>-3</sup> ) | NO <sub>2</sub> (μg. m <sup>-3</sup> ) | O <sub>3</sub> _8 h (μg. m <sup>-3</sup> ) |
|----------|-----|------------------------------------------|-----------------------------------------|----------------------------------------|---------------------------|----------------------------------------|--------------------------------------------|
| 16-29    | 63  | 12                                       | 40                                      | 10                                     | 0.4                       | 13                                     | 116                                        |



**Table S8.** KEGG orthologs (KOs) identified the key genotypic features. Relative abundance pathways in KEGG level 2 in the grapevine rhizosphere.

| Metabolism                                | Zin    | Gem    | Rie    | Syr    | Mer    | Cha    | Cab    | Pin    |
|-------------------------------------------|--------|--------|--------|--------|--------|--------|--------|--------|
| Membrane Transport                        | 12.21% | 12.07% | 12.48% | 11.96% | 12.08% | 12.34% | 12.29% | 12.37% |
| Amino Acid Metabolism                     | 11.41% | 11.37% | 11.32% | 11.38% | 11.46% | 11.41% | 11.47% | 11.28% |
| Carbohydrate Metabolism                   | 10.83% | 10.84% | 10.85% | 10.80% | 10.91% | 10.88% | 10.94% | 10.74% |
| Replication and Repair                    | 6.79%  | 6.76%  | 6.79%  | 6.85%  | 6.79%  | 6.75%  | 6.76%  | 6.80%  |
| Energy Metabolism                         | 5.48%  | 5.52%  | 5.41%  | 5.51%  | 5.50%  | 5.48%  | 5.45%  | 5.44%  |
| Poorly Characterized                      | 4.87%  | 4.91%  | 4.91%  | 4.91%  | 4.87%  | 4.85%  | 4.85%  | 4.93%  |
| Xenobiotics Biodegradation and Metabolism | 4.56%  | 4.52%  | 4.49%  | 4.47%  | 4.59%  | 4.58%  | 4.60%  | 4.43%  |
| Lipid Metabolism                          | 4.18%  | 4.20%  | 4.11%  | 4.13%  | 4.21%  | 4.17%  | 4.19%  | 4.10%  |
| Metabolism of Cofactors and Vitamins      | 4.14%  | 4.14%  | 4.08%  | 4.17%  | 4.14%  | 4.12%  | 4.12%  | 4.11%  |
| Translation                               | 3.97%  | 3.96%  | 3.92%  | 4.02%  | 3.96%  | 3.94%  | 3.94%  | 3.96%  |
| Nucleotide Metabolism                     | 3.14%  | 3.13%  | 3.14%  | 3.17%  | 3.15%  | 3.13%  | 3.14%  | 3.14%  |
| Cellular Processes and Signaling          | 3.11%  | 3.11%  | 3.15%  | 3.17%  | 3.07%  | 3.07%  | 3.05%  | 3.19%  |
| Cell Motility                             | 2.55%  | 2.61%  | 2.60%  | 2.64%  | 2.54%  | 2.56%  | 2.51%  | 2.66%  |

|                                             |       |       |       |       |       |       |       |       |
|---------------------------------------------|-------|-------|-------|-------|-------|-------|-------|-------|
| Metabolism                                  | 2.47% | 2.47% | 2.49% | 2.51% | 2.47% | 2.48% | 2.47% | 2.48% |
| Metabolism of Terpenoids and Polyketides    | 2.48% | 2.49% | 2.44% | 2.45% | 2.50% | 2.48% | 2.49% | 2.44% |
| Transcription                               | 2.37% | 2.38% | 2.38% | 2.37% | 2.37% | 2.37% | 2.37% | 2.37% |
| Folding, Sorting and Degradation            | 2.14% | 2.15% | 2.13% | 2.16% | 2.14% | 2.13% | 2.13% | 2.14% |
| Genetic Information Processing              | 2.07% | 2.07% | 2.12% | 2.12% | 2.06% | 2.06% | 2.04% | 2.15% |
| Metabolism of Other Amino Acids             | 2.07% | 2.06% | 2.05% | 2.05% | 2.06% | 2.07% | 2.07% | 2.05% |
| Signal Transduction                         | 2.00% | 2.03% | 2.03% | 1.98% | 1.98% | 2.00% | 1.98% | 2.04% |
| Enzyme Families                             | 1.85% | 1.86% | 1.85% | 1.86% | 1.85% | 1.84% | 1.85% | 1.84% |
| Glycan Biosynthesis and Metabolism          | 1.49% | 1.53% | 1.48% | 1.51% | 1.47% | 1.46% | 1.46% | 1.52% |
| Biosynthesis of Other Secondary Metabolites | 1.04% | 1.04% | 1.02% | 1.03% | 1.04% | 1.04% | 1.04% | 1.01% |
| others                                      | 2.81% | 2.79% | 2.79% | 2.80% | 2.79% | 2.80% | 2.80% | 2.81% |

**Table S9.** KEGG orthologs (KOs) identified the key genotypic features. Relative abundance pathways in KEGG level 3 in the grapevine rhizosphere.

| Metabolism                            | Zin   | Gem   | Rie   | Syr   | Mer   | Cha   | Cab   | Pin   |
|---------------------------------------|-------|-------|-------|-------|-------|-------|-------|-------|
| Transporters                          | 6.26% | 6.15% | 6.38% | 6.06% | 6.19% | 6.34% | 6.32% | 6.28% |
| ABC transporters                      | 3.84% | 3.80% | 3.90% | 3.72% | 3.79% | 3.90% | 3.87% | 3.86% |
| General function prediction only      | 3.42% | 3.46% | 3.43% | 3.44% | 3.43% | 3.41% | 3.41% | 3.43% |
| DNA repair and recombination proteins | 2.31% | 2.30% | 2.32% | 2.33% | 2.32% | 2.30% | 2.31% | 2.31% |
| Two-component system                  | 1.87% | 1.91% | 1.91% | 1.86% | 1.86% | 1.88% | 1.86% | 1.92% |
| Purine metabolism                     | 1.89% | 1.88% | 1.88% | 1.89% | 1.89% | 1.88% | 1.88% | 1.89% |
| Ribosome                              | 1.61% | 1.61% | 1.59% | 1.63% | 1.61% | 1.60% | 1.60% | 1.60% |
| Function unknown                      | 1.45% | 1.45% | 1.49% | 1.47% | 1.44% | 1.44% | 1.44% | 1.50% |
| Peptidases                            | 1.43% | 1.43% | 1.42% | 1.45% | 1.43% | 1.42% | 1.43% | 1.42% |
| Transcription factors                 | 1.40% | 1.39% | 1.44% | 1.39% | 1.39% | 1.40% | 1.40% | 1.43% |
| Secretion system                      | 1.38% | 1.40% | 1.42% | 1.43% | 1.38% | 1.38% | 1.37% | 1.44% |
| Bacterial motility proteins           | 1.31% | 1.35% | 1.33% | 1.36% | 1.31% | 1.31% | 1.29% | 1.36% |
| Butanoate metabolism                  | 1.33% | 1.34% | 1.32% | 1.31% | 1.35% | 1.34% | 1.35% | 1.30% |

|                                             |       |       |       |       |       |       |       |       |
|---------------------------------------------|-------|-------|-------|-------|-------|-------|-------|-------|
| Oxidative phosphorylation                   | 1.31% | 1.32% | 1.27% | 1.32% | 1.31% | 1.30% | 1.29% | 1.29% |
| Arginine and proline metabolism             | 1.27% | 1.27% | 1.27% | 1.27% | 1.27% | 1.28% | 1.28% | 1.27% |
| Pyrimidine metabolism                       | 1.26% | 1.26% | 1.25% | 1.27% | 1.26% | 1.25% | 1.26% | 1.26% |
| Valine, leucine and isoleucine degradation  | 1.21% | 1.22% | 1.20% | 1.19% | 1.23% | 1.22% | 1.23% | 1.19% |
| Propanoate metabolism                       | 1.19% | 1.20% | 1.18% | 1.17% | 1.21% | 1.20% | 1.21% | 1.17% |
| Pyruvate metabolism                         | 1.17% | 1.18% | 1.18% | 1.18% | 1.18% | 1.18% | 1.18% | 1.17% |
| Amino acid related enzymes                  | 1.16% | 1.16% | 1.15% | 1.17% | 1.16% | 1.16% | 1.15% | 1.16% |
| Glycolysis / Gluconeogenesis                | 1.12% | 1.12% | 1.13% | 1.12% | 1.13% | 1.13% | 1.13% | 1.11% |
| Carbon fixation pathways in prokaryotes     | 1.09% | 1.10% | 1.07% | 1.10% | 1.10% | 1.09% | 1.09% | 1.08% |
| Methane metabolism                          | 1.08% | 1.09% | 1.07% | 1.08% | 1.10% | 1.09% | 1.08% | 1.06% |
| Chromosome                                  | 1.08% | 1.08% | 1.08% | 1.10% | 1.07% | 1.07% | 1.06% | 1.09% |
| Fatty acid metabolism                       | 1.03% | 1.04% | 1.02% | 1.01% | 1.05% | 1.04% | 1.05% | 1.01% |
| Ribosome Biogenesis                         | 0.99% | 0.99% | 0.99% | 1.00% | 0.99% | 0.98% | 0.98% | 1.00% |
| Others                                      | 0.96% | 0.96% | 0.97% | 1.01% | 0.97% | 0.97% | 0.97% | 0.98% |
| Glycine, serine and threonine metabolism    | 0.97% | 0.96% | 0.97% | 0.97% | 0.98% | 0.97% | 0.97% | 0.97% |
| Amino sugar and nucleotide sugar metabolism | 0.96% | 0.96% | 0.96% | 0.96% | 0.96% | 0.96% | 0.96% | 0.95% |
| Other ion-coupled transporters              | 0.95% | 0.93% | 0.99% | 0.97% | 0.95% | 0.94% | 0.94% | 0.98% |

|                                             |       |       |       |       |       |       |       |       |
|---------------------------------------------|-------|-------|-------|-------|-------|-------|-------|-------|
| Alanine, aspartate and glutamate metabolism | 0.94% | 0.93% | 0.93% | 0.93% | 0.94% | 0.94% | 0.94% | 0.93% |
| Aminoacyl-tRNA biosynthesis                 | 0.91% | 0.90% | 0.89% | 0.91% | 0.90% | 0.90% | 0.90% | 0.89% |
| Citrate cycle (TCA cycle)                   | 0.89% | 0.90% | 0.88% | 0.89% | 0.90% | 0.89% | 0.90% | 0.88% |
| Lipid biosynthesis proteins                 | 0.89% | 0.89% | 0.86% | 0.88% | 0.89% | 0.88% | 0.88% | 0.87% |
| Porphyrin and chlorophyll metabolism        | 0.87% | 0.88% | 0.85% | 0.87% | 0.87% | 0.88% | 0.87% | 0.87% |
| Tryptophan metabolism                       | 0.85% | 0.85% | 0.84% | 0.83% | 0.86% | 0.86% | 0.86% | 0.83% |
| Glyoxylate and dicarboxylate metabolism     | 0.84% | 0.84% | 0.84% | 0.82% | 0.84% | 0.84% | 0.84% | 0.84% |
| Transcription machinery                     | 0.84% | 0.86% | 0.81% | 0.84% | 0.85% | 0.84% | 0.84% | 0.82% |
| Energy metabolism                           | 0.81% | 0.81% | 0.81% | 0.80% | 0.80% | 0.81% | 0.80% | 0.81% |
| Benzoate degradation                        | 0.79% | 0.79% | 0.79% | 0.77% | 0.81% | 0.80% | 0.81% | 0.77% |
| Chaperones and folding catalysts            | 0.77% | 0.78% | 0.77% | 0.78% | 0.76% | 0.76% | 0.76% | 0.78% |
| Cysteine and methionine metabolism          | 0.77% | 0.76% | 0.76% | 0.77% | 0.76% | 0.76% | 0.76% | 0.76% |
| Valine, leucine and isoleucine biosynthesis | 0.75% | 0.76% | 0.74% | 0.76% | 0.76% | 0.75% | 0.76% | 0.75% |
| DNA replication proteins                    | 0.75% | 0.75% | 0.76% | 0.76% | 0.75% | 0.75% | 0.75% | 0.76% |
| Nitrogen metabolism                         | 0.75% | 0.75% | 0.75% | 0.74% | 0.75% | 0.75% | 0.74% | 0.75% |
| Protein folding and associated processing   | 0.70% | 0.70% | 0.70% | 0.70% | 0.69% | 0.70% | 0.69% | 0.70% |
| Lysine degradation                          | 0.69% | 0.69% | 0.68% | 0.67% | 0.69% | 0.69% | 0.69% | 0.67% |

|                                                     |        |        |        |        |        |        |        |        |
|-----------------------------------------------------|--------|--------|--------|--------|--------|--------|--------|--------|
| Pentose phosphate pathway                           | 0.66%  | 0.66%  | 0.67%  | 0.66%  | 0.66%  | 0.66%  | 0.66%  | 0.67%  |
| Phenylalanine, tyrosine and tryptophan biosynthesis | 0.64%  | 0.64%  | 0.63%  | 0.65%  | 0.64%  | 0.64%  | 0.64%  | 0.64%  |
| beta-Alanine metabolism                             | 0.64%  | 0.64%  | 0.63%  | 0.62%  | 0.65%  | 0.64%  | 0.65%  | 0.63%  |
| Homologous recombination                            | 0.64%  | 0.63%  | 0.63%  | 0.65%  | 0.64%  | 0.63%  | 0.63%  | 0.64%  |
| Aminobenzoate degradation                           | 0.64%  | 0.64%  | 0.62%  | 0.62%  | 0.64%  | 0.64%  | 0.64%  | 0.61%  |
| Bacterial secretion system                          | 0.62%  | 0.62%  | 0.65%  | 0.64%  | 0.61%  | 0.62%  | 0.62%  | 0.66%  |
| others                                              | 34.08% | 34.08% | 33.94% | 34.19% | 34.04% | 33.98% | 33.99% | 34.04% |

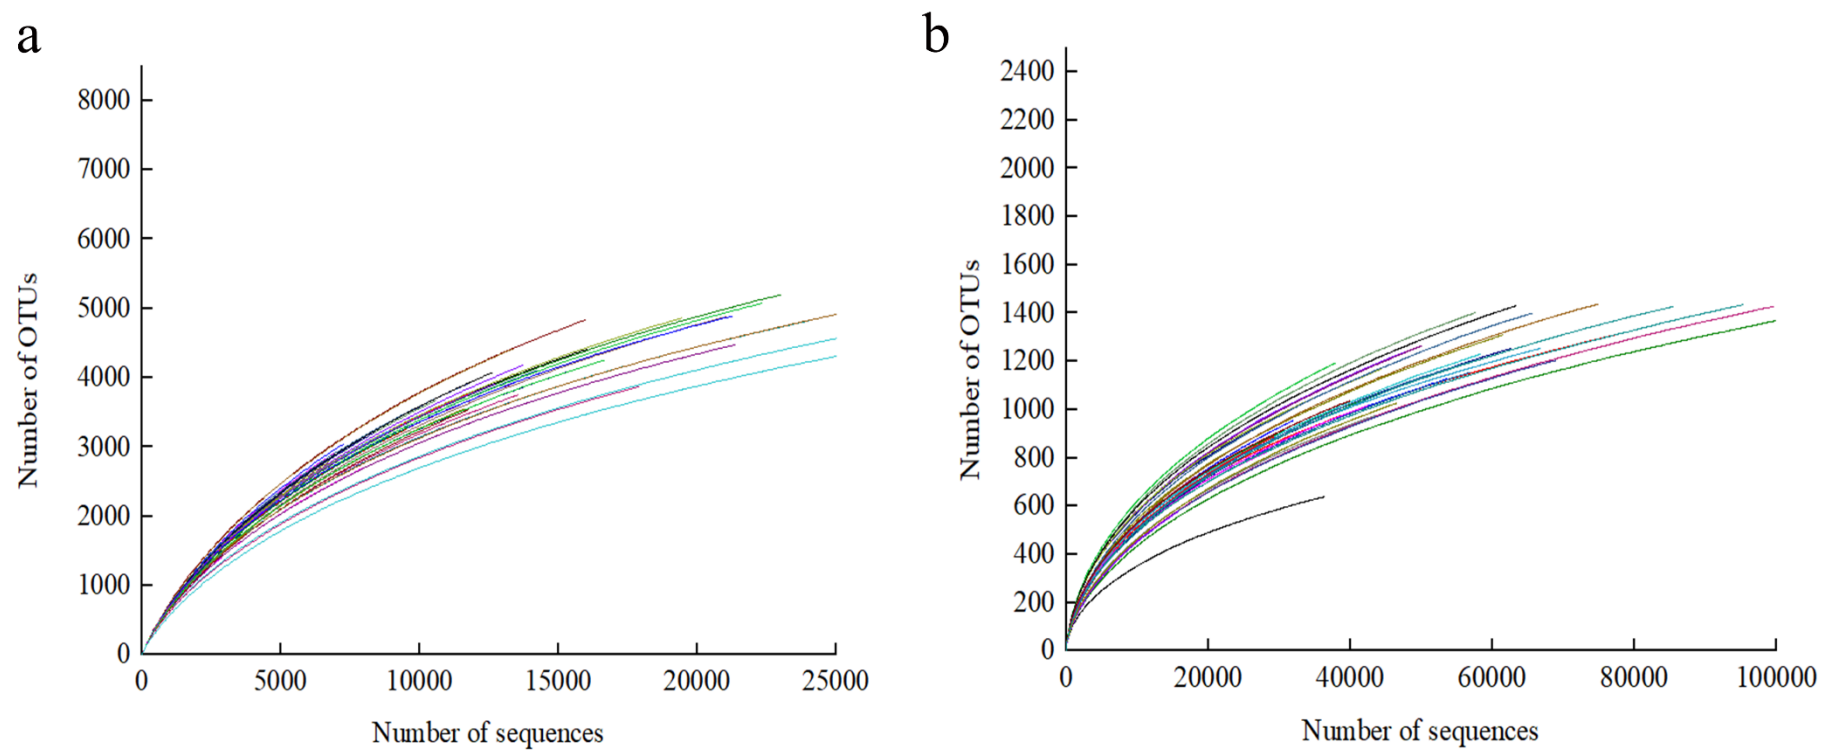

**Figure S1.** The rarefaction curves of bacteria (a) and fungi (b).

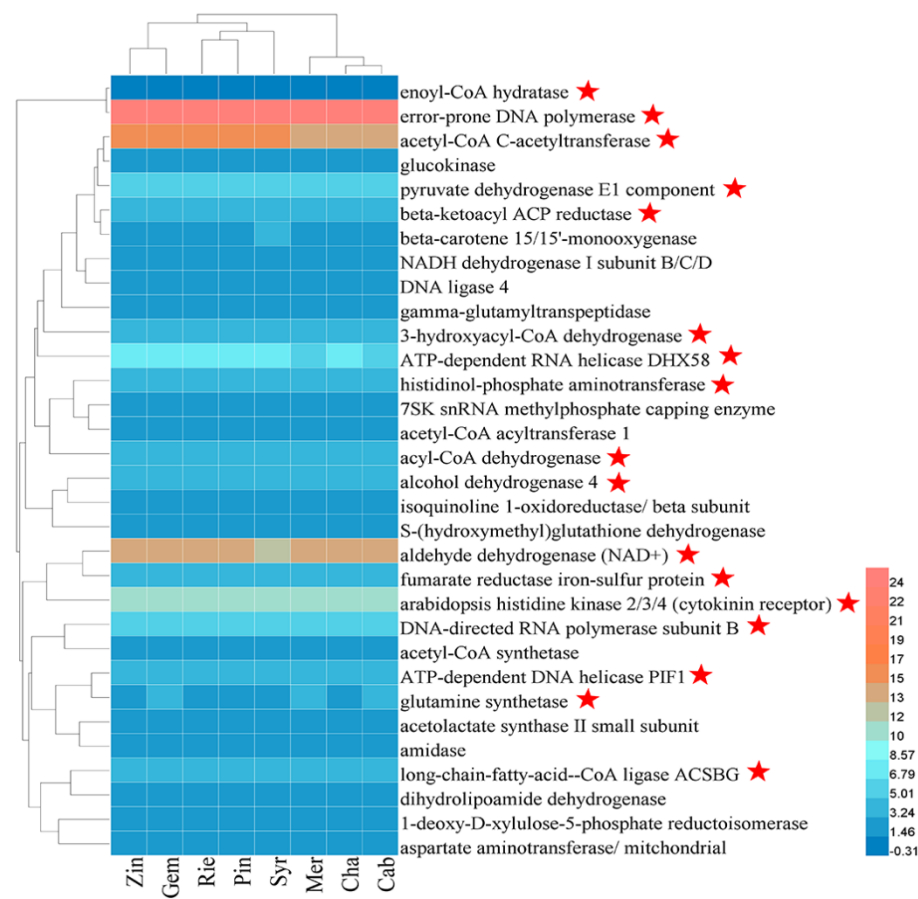

**Figure S2.** KEGG orthologs (KOs) identified the key genotypic features. The 32 most prevalent ECs, standardized by Z-score across all data sets, and the stars represents the relatives of enzyme larger than 3.0%.
